# Supplementary material
Source: publisher site journal article supplement (https://www.dovepress.com/article/343575)

**Supplementary Table S1. Primers used for qRT-PCR assay.**

| <b>Gene names</b>     | <b>Forward/Reverse</b> | <b>Sequences 5'-3'</b>  |
|-----------------------|------------------------|-------------------------|
| Mouse-SNHG14          | Forward                | CCTCCCATAATCTGGAGGTTGGT |
|                       | Reverse                | ACAGGGTGGTAGTCAAGTCATG  |
| Mouse- $\beta$ -actin | Forward                | CCATGTACGTTGCTATCCAG    |
|                       | Reverse                | CTTCATGAGGTAGTCAGTCAG   |
| Mouse-miR-223-3p      | Forward                | AGCCCGTGTCAGTTTGTCAAAT  |
|                       | Reverse                | CAGTGCAGGGTCCGAGGT      |
| Mouse-U6              | Forward                | CTCGCTTCGGCAGCACA       |
|                       | Reverse                | AACGCTTACGAATTTGCGT     |

**Supplementary Table S2. Sequences used for cell transfection.**

| <b>Names</b>               | <b>Sequences 5'-3'</b>  |
|----------------------------|-------------------------|
| Mouse-NC mimic             | GGCUCUAGAAAAGCCUAUGC    |
| Mouse-miR-223-3p mimic     | UGUCAGUUUGUCAAAUACCCCA  |
| Mouse-NC inhibitor         | CAGUACUUUUGUGUAGUACAAA  |
| Mouse-miR-223-3p inhibitor | UGGGGUAAUUUGACAAACUGACA |
| Mouse-NC siRNA             | UUCUCCGAACGUGUCACGUTT   |
| Mouse-SNHG14 siRNA         | CUACUACCUAUGACCAUUA     |

**Supplementary Figure S1. A schematic illustration showing the design of *in-vivo* experiments.**

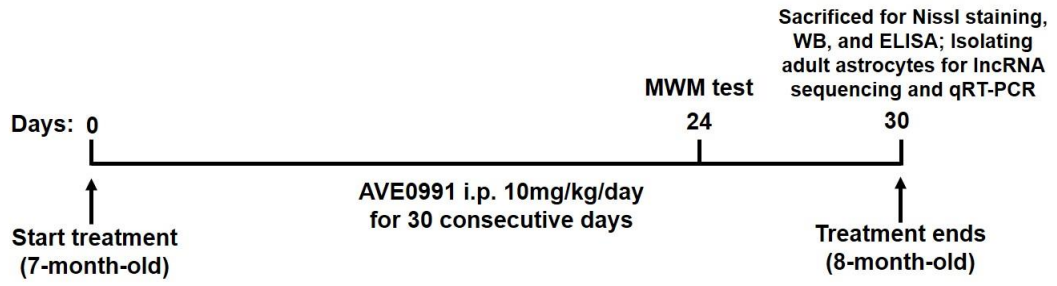

**Supplementary Figure S2. The effect of AVE0991 on spatial cognitive functions in WT control.**

Data shows the path length of each group in the hidden platform test (n=12 per group). All data are expressed as the means  $\pm$  SD.

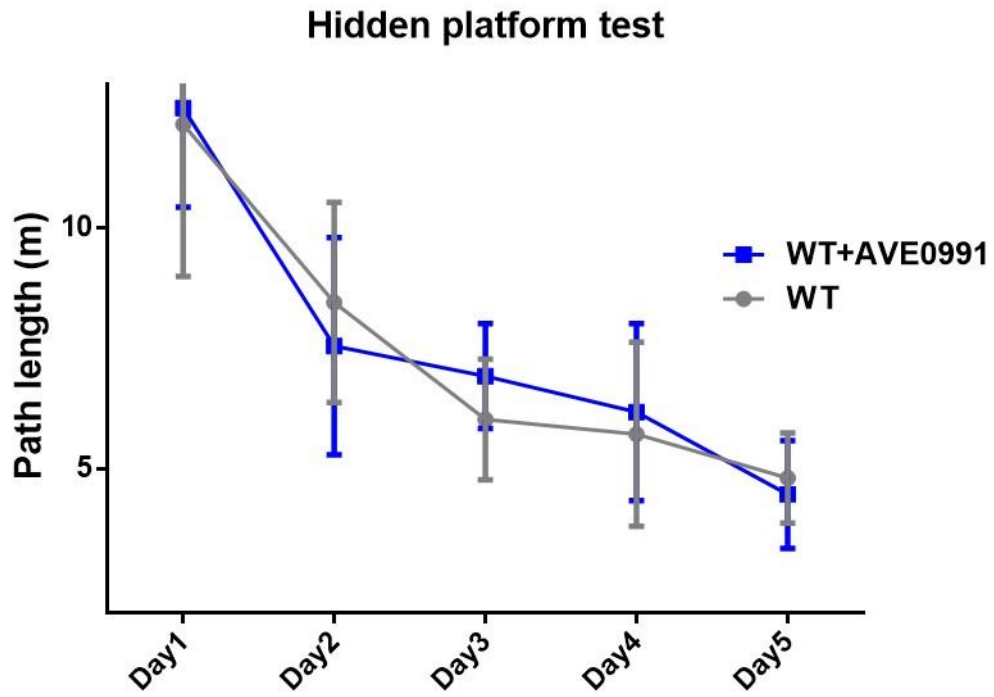

**Supplementary Figure S3. The effect of AVE0991 on brain A $\beta_{1-42}$  levels in APP/PS1 mice. ELISA**

assay of A $\beta_{1-42}$  in the brain (n=6 per group). All data are expressed as the means  $\pm$  SD.

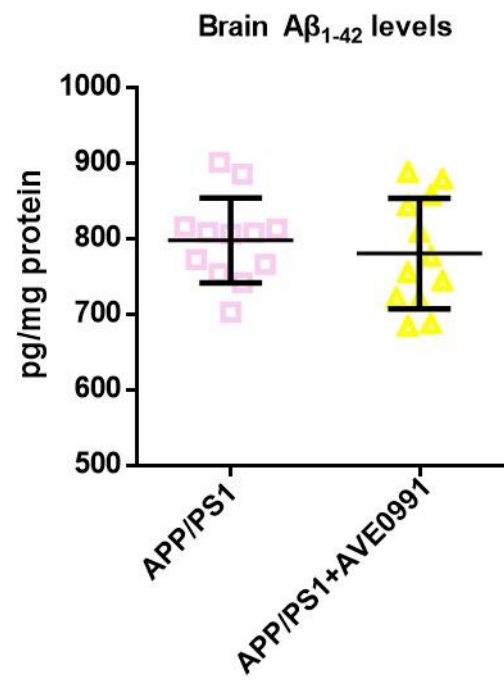

**Supplementary Figure S4. The qRT-PCR result of SNHG14 expression in the primary astrocytes.**

All data are expressed as the means  $\pm$  SD of three independent experiments. \* $P$ <0.05 versus the LV-Con group.

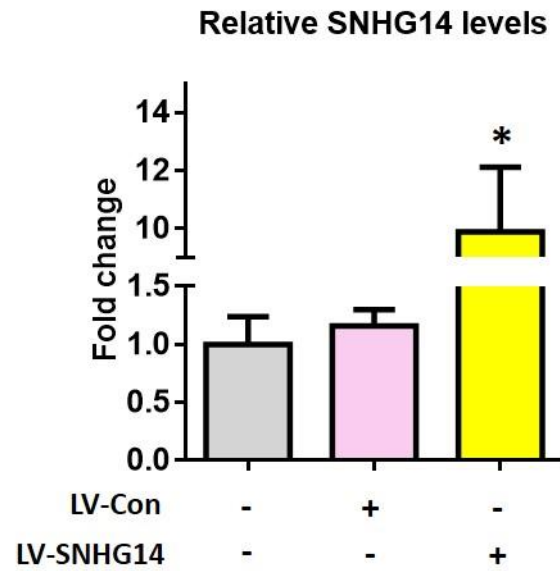

**Supplementary Figure S5. Subcellular localization of SNHG14 in astrocytes of mouse brain.**

SNHG14 was expressed predominately in the cytoplasm of astrocyte. Scale bar=20  $\mu\text{m}$ .

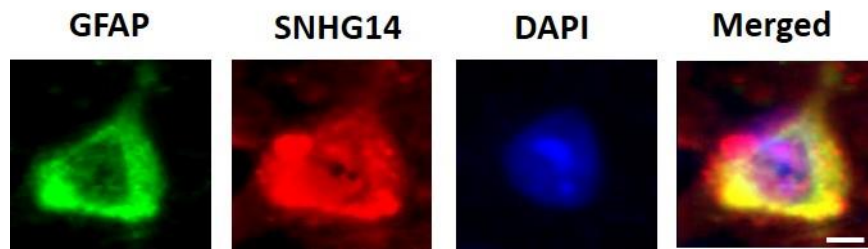

**Supplementary Figure S6. The qRT-PCR result of SNHG14 expression in the primary astrocytes.**

All data are expressed as the means  $\pm$  SD of three independent experiments. \* $P$ <0.05 versus the LV-Con group. # $P$ <0.05 versus the Con siRNA group.

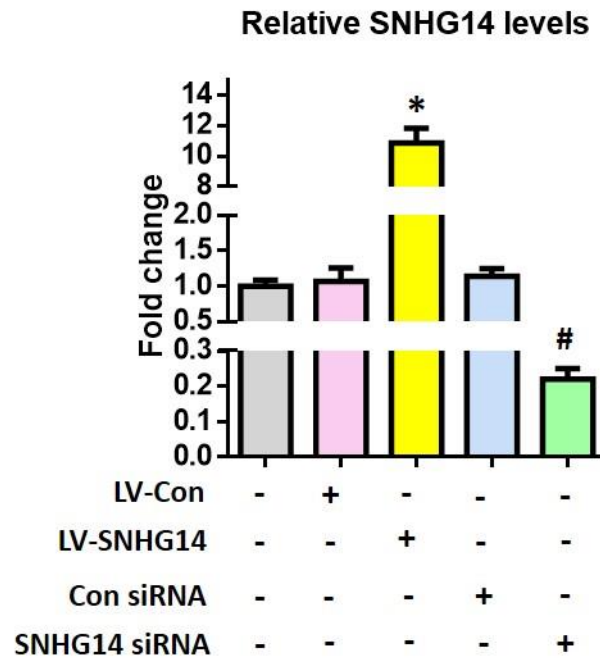

Supplement: Supplementary file 1 [file get_supplementary_file.php]
